# Supplementary material for: Participatory governance over research in an academic research network: the case of Diabetes Action Canada
Source: PubMed Central journal article supplement — BMJ Open. 2019 Apr 20;9(4):e026828. doi: 10.1136/bmjopen-2018-026828 (PMC6500288; doi:10.1136/bmjopen-2018-026828), 2019-04-20
Supplement: bmjopen-2018-026828supp001.pdf [file bmjopen-2018-026828supp001.pdf]

## Appendix 1

### Diabetes Action Canada – Data Governance Working Group Members

| Person                     | Affiliation / Role                                                                                                                                                                                                                                                                                     | Representation / Expertise                                                                                             |
|----------------------------|--------------------------------------------------------------------------------------------------------------------------------------------------------------------------------------------------------------------------------------------------------------------------------------------------------|------------------------------------------------------------------------------------------------------------------------|
| Donald Willison<br>(Chair) | Associate Professor, Institute of Health Policy, Management and Evaluation, University of Toronto                                                                                                                                                                                                      | Data governance, public involvement in research.                                                                       |
| Richard Birtwhistle        | Emeritus Professor of Family Medicine and Public Health Sciences, Queen's University                                                                                                                                                                                                                   | Founding Chair, Canadian Primary Care Sentinel Surveillance Network (CPCSSN)                                           |
| Serge Dumont               | Professor, School of Social Work, Faculty of Social Sciences, Laval University<br>Scientific director, Laval University Community-Based Primary Health Care Research Centre                                                                                                                            | Leading the Best data governance practices: Systematic Review. CIUSSS de la Capitale-Nationale, Quebec-City, QC        |
| Ross Gray                  | Patient Partner, Diabetes Action Canada, CIHR SPOR Network                                                                                                                                                                                                                                             | Patient representative                                                                                                 |
| Michelle Greiver           | Associate Professor, Dept. of Family and Community Medicine, University of Toronto<br><i>Gordon F. Cheesbrough Research Chair in Family and Community Medicine</i> , North York General Hospital                                                                                                       | Director, University of Toronto Practice-based Research Network, which is part of CPCSSN. Health Informatics expertise |
| Karim Keshavjee            | CEO, InfoClin Inc.<br>Adjunct Professor, Institute for Health Policy, Management and Evaluation, University of Toronto                                                                                                                                                                                 | Data governance, System architecture design, Health informatics                                                        |
| Donna Manca                | Research Director and Professor, Department of Family Medicine, Faculty of Medicine & Dentistry, University of Alberta                                                                                                                                                                                 | Data governance                                                                                                        |
| Frank Sullivan             | Professor of Primary Care Medicine, University of St. Andrews. Director of Research, School of Medicine.<br>Professor, Department of Family & Community Medicine and Dalla Lana School of Public Health, University of Toronto.<br>Adjunct Scientist Institute for Clinical Evaluative Sciences (ICES) | Established the SHARE register and recruitment tool, NHS Scotland                                                      |
| Xiaolin Wei                | Associate Professor, Clinical Public Health Division, and Institute of Health Policy, Management and                                                                                                                                                                                                   | Established diabetes registry in China                                                                                 |

| Person | Affiliation / Role                                                     | Representation / Expertise |
|--------|------------------------------------------------------------------------|----------------------------|
|        | Evaluation, Dalla Lana School of Public Health, University of Toronto. |                            |

## Diabetes Action Canada – Technical Committee Members

| Person                      | Affiliation / Role                                                                                                                                                                               | Representation / Expertise                                                                                             |
|-----------------------------|--------------------------------------------------------------------------------------------------------------------------------------------------------------------------------------------------|------------------------------------------------------------------------------------------------------------------------|
| Michelle Greiver<br>(Chair) | Associate Professor, Dept. of Family and Community Medicine, University of Toronto<br><i>Gordon F. Cheesbrough Research Chair in Family and Community Medicine</i> , North York General Hospital | Director, University of Toronto Practice-based Research Network, which is part of CPCSSN. Health Informatics expertise |
| Babak Aliazardeh            | UTOPIAN Data Analytics Manager, Department of Family and Community Medicine, University of Toronto                                                                                               | Development and maintenance of UTOPIAN primary care/ EMR data repository, data management and health informatics.      |
| Aashka Bhatt                | Research Officer, Diabetes Action Canada – CIHR SPOR Network.<br>University of Toronto Practice-Based Research Network, Dept. of Family and Community Medicine, University of Toronto            | Administrator and Practice Facilitator                                                                                 |
| Neil Drummond               | Professor and Alberta Health Services Research Chair in Primary Care<br>Department of Family Medicine, University of Alberta                                                                     | Epidemiology, research methods, primary care EMR data.                                                                 |
| Christopher Ducharme        | Manager of Research Informatics at the Applied Health Research Centre at St. Michael's Hospital                                                                                                  | Electronic data capture and clinical data management systems                                                           |
| Jean-François Ethier        | Clinician-scientist, and Associate Professor, Department of Medicine, Université de Sherbrooke and the Sherbrooke University Health Center.                                                      | Director of the data access group, Quebec SPOR Support Unit / Health informatics expertise                             |
| Shivani Goyal               | Assistant Professor, Dalla Lana School of Public Health, Institute of Health Policy, Management and Evaluation, University of Toronto<br>Lead - Strategy & Research, University Health Network.  | Patient perspective, feasibility and applicability of architecture for patient-centered population health projects.    |
| Karim Keshavjee             | CEO, InfoClin Inc                                                                                                                                                                                | Data governance, System architecture design, Health informatics                                                        |

| Person              | Affiliation / Role                                                                                                                                                                                                                                                                                     | Representation / Expertise                                                                                                  |
|---------------------|--------------------------------------------------------------------------------------------------------------------------------------------------------------------------------------------------------------------------------------------------------------------------------------------------------|-----------------------------------------------------------------------------------------------------------------------------|
|                     | Adjunct Professor, Institute for Health Policy, Management and Evaluation, University of Toronto                                                                                                                                                                                                       |                                                                                                                             |
| Ken Martin          | Information & Technology Manager, Canadian Primary Care Sentinel Surveillance Network (CPCSSN)                                                                                                                                                                                                         | Health informatics, Enterprise & system architecture, Data governance & processing, Primary care EMR data                   |
| Doug Mumford        | Patient Partner, Diabetes Action Canada, CIHR SPOR Network                                                                                                                                                                                                                                             | As volunteer at Leadership Sinai Centre for Diabetes, lead development of online patient portal for persons with diabetes.  |
| Frank Sullivan      | Professor of Primary Care Medicine, University of St. Andrews. Director of Research, School of Medicine.<br>Professor, Department of Family & Community Medicine and Dalla Lana School of Public Health, University of Toronto.<br>Adjunct Scientist Institute for Clinical Evaluative Sciences (ICES) | Established the SHARE register and recruitment tool, NHS Scotland                                                           |
| Charles Victor      | Senior Director, Strategic Partnerships and External Services at ICES – Institute for Clinical Evaluative Sciences                                                                                                                                                                                     | Data repository management, data linkage and data access models for the purpose of research                                 |
| Catharine Whiteside | Executive Director, SPOR Network in Diabetes, Emerita Professor and Former Dean of Medicine, University of Toronto                                                                                                                                                                                     | Dr. Whiteside is a MD and PhD graduate from the University of Toronto and is certified in Internal Medicine and Nephrology. |
| Donald Willison     | Associate Professor, Institute of Health Policy, Management and Evaluation, University of Toronto                                                                                                                                                                                                      | Data governance, public involvement in research.                                                                            |
